# Supplementary material for: Identification of serologic biomarkers for predicting microvascular invasion in hepatocellular carcinoma
Source: PubMed Central journal article supplement (PMC4941320; doi:10.18632/oncotarget.7649), 2016-02-23
Supplement: oncotarget-07-16362-s001.pdf [file oncotarget-07-16362-s001.pdf]

## Identification of serologic biomarkers for predicting microvascular invasion in hepatocellular carcinoma

### Supplementary Materials

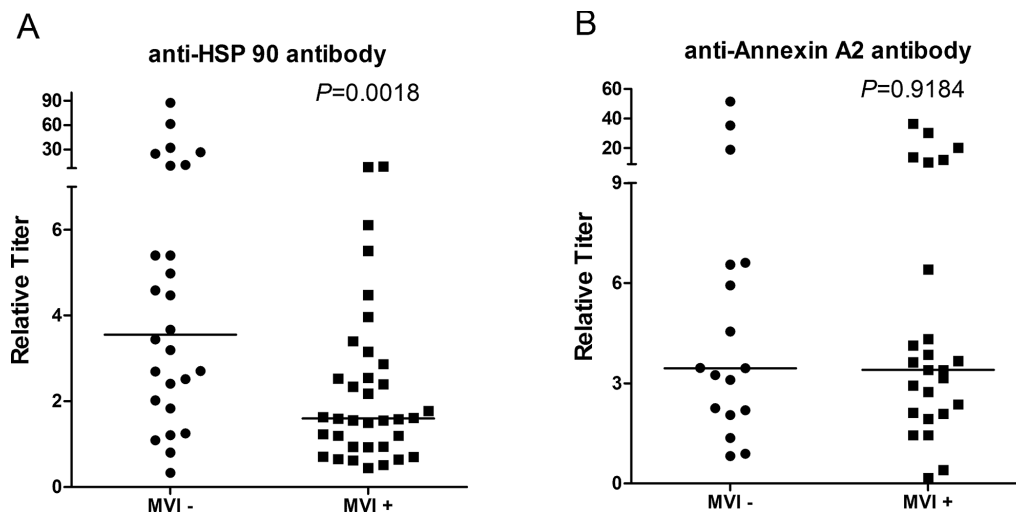

**Supplementary Figure S1: Relative titers of anti-HSP 90 and anti-Annexin A2 antibodies in HCC patients' sera.** (A) The median relative titers of anti-HSP 90 antibody were 3.555 and 1.596 in sera of MVI (-) and MVI (+) patients, respectively. The relative titer of anti-HSP 90 antibody in the MVI (-) patients was significantly higher than that in the MVI (+) patients with a  $P$  value of 0.0018. (B) The median relative titers of anti-Annexin A2 antibody were 3.451 and 3.401 in sera of MVI (-) and MVI (+) patients, respectively. There was no significant statistical difference in the titers of anti-Annexin A2 antibodies between MVI (+) and MVI (-) HCC patients.

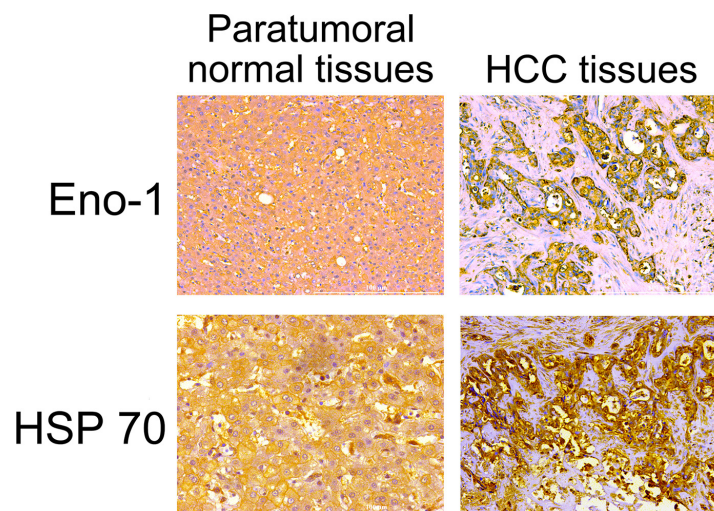

**Supplementary Figure S2: Immunohistochemistry of Eno-1 and HSP 70 in HCC tissues comparing to paratumoral normal tissues.** HSP 70 and Eno-1 are expressed in HCC tissues, but minimally in paratumoral normal tissues.

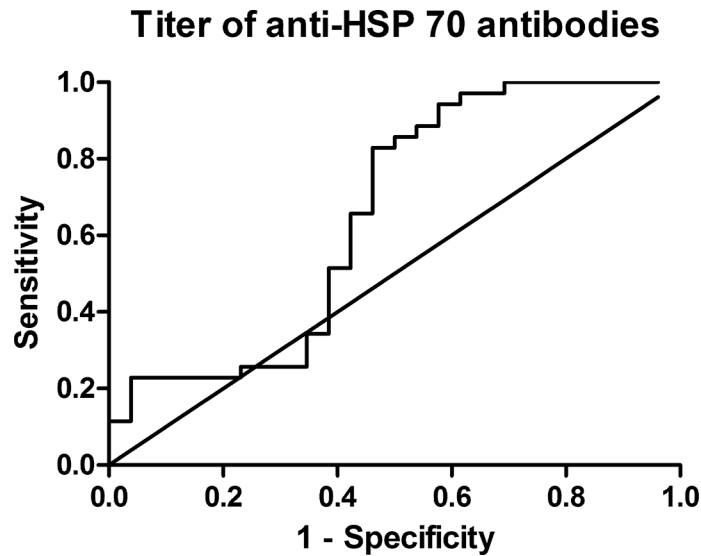

**Supplementary Figure S3: The receiver operating characteristic curve of anti-HSP 70 antibodies for predicting MVI.** The cut-off value of titer of anti-HSP 70 antibody for predicting MVI is 5.856 with 82.86% sensitivity and 53.85% specificity. The area under the ROC curve is 0.6538.

**Supplemental Table S1: Univariate analysis of clinicopathologic factors and biomarkers potentially associated with MVI**

| Variables                           | MVI (-) ( <i>n</i> = 26) | MVI (+) ( <i>n</i> = 35) | <i>P</i> value |
|-------------------------------------|--------------------------|--------------------------|----------------|
| Gender                              |                          |                          | 0.1251         |
| Male                                | 21                       | 33                       |                |
| Female                              | 5                        | 2                        |                |
| Age (year)                          | 54.85 ± 10.19            | 53.6 ± 13.8              | 0.6992         |
| Number of tumors                    |                          |                          | 0.7717         |
| Single                              | 20                       | 28                       |                |
| Multiple                            | 6                        | 7                        |                |
| Largest tumor size (cm)             | 4.25 (2.5–6.125)         | 4.5 (2–6)                | 0.9767         |
| Differentiation                     |                          |                          | 0.3131         |
| Well                                | 6                        | 9                        |                |
| Moderate                            | 17                       | 17                       |                |
| Poor                                | 3                        | 9                        |                |
| Titer of anti-HSP 70 antibodies     | 6.517 (2.244–23.89)      | 3.537 (2.261–5.461)      | 0.0419         |
| Titer of anti-HSP 90 antibodies     | 3.555 (1.975–10.200)     | 1.596 (0.94–2.866)       | 0.0018         |
| Titer of anti-Eno-1 antibodies      | 4.676 (1.236–10.75)      | 10.29 (5.74–15.48)       | 0.0040         |
| Titer of anti-Annexin A2 antibodies | 3.451 (2.122–6.580)      | 3.401 (2.101–8.327)      | 0.9184         |

MVI, microvascular invasion. Eno-1, alpha-enolase.
